# Supplementary material for: A Bayesian method for calculating real-time quantitative PCR calibration curves using absolute plasmid DNA standards
Source: PubMed Central journal article supplement (PMC2292693; doi:10.1186/1471-2105-9-120), 2008-02-25
Supplement: 1471-2105-9-120-S2.pdf [file 1471-2105-9-120-S2.pdf]

## Appendix B

```
# generating a calibration curve for HF183 genome type
model
{
# genome and plasmid calibration curves for Assays Btheta, Entero1 and Entero2
  for( i in 1 : n ) {
    CT_genome[i] ~ dnorm(mu1[i],tau_g[set[i]])
    mu1[i] <- alpha_g[set[i]] + beta_g[set[i]] * (log(Copy[i]) )/log(10)
    CT_plasmid[i] ~ dnorm(mu2[i],tau_p[set[i]])
    mu2[i] <- alpha_p[set[i]] + beta_p[set[i]] * (log(Copy[i]) )/log(10) }
# plasmid calibration curve for assay HF183
  for( i in 1:n4) {
    CT_plasmid4[i] ~ dnorm(mu4[i],tau_p4[run4[i]])
    mu4[i] <- alpha_p4[run4[i]] + beta_p4[run4[i]] * (log(Copy4[i]) )/log(10)
# 8 independent slope and intercept parameters for Btheta (plasmid and genome)
  for( i in 1 : 5) {
    beta_g[i] ~ dnorm(bg[1],taubg[1])
    alpha_g[i] ~ dnorm(ag[1], tauag[1])
    beta_p[i] ~ dnorm(bp[1],taubp[1])
    alpha_p[i] ~ dnorm(ap[1], tauap[1]) }
# 8 independent slope and intercept parameters for Entero1 (plasmid and genome)
  for( i in 6 : 10) {
    beta_g[i] ~ dnorm(bg[2],taubg[2])
    alpha_g[i] ~ dnorm(ag[2], tauag[2])
    beta_p[i] ~ dnorm(bp[2],taubp[2])
    alpha_p[i] ~ dnorm(ap[2], tauap[2]) }
# 7 independent slope and intercept parameters for Entero2 (plasmid and genome)
  for( i in 11 : 15) {
    beta_g[i] ~ dnorm(bg[3],taubg[3])
    alpha_g[i] ~ dnorm(ag[3], tauag[3])
    beta_p[i] ~ dnorm(bp[3],taubp[3])
    alpha_p[i] ~ dnorm(ap[3], tauap[3]) }
# 5 independent slope and intercept parameters for HF183 (only plasmid)
  for( i in 1 : 7) {
    beta_p4[i] ~ dnorm(bp4,taubp4)
    alpha_p4[i] ~ dnorm(ap4, tauap4) }
# non-informative priors
  for( i in 1:m) {
    tau_g[i] ~ dgamma(.001,.001)
    tau_p[i] ~ dgamma(.001,.001) }
  for( i in 1 : 3) {
    ap[i] ~ dnorm(0,1.0E-4)
    bp[i] ~ dnorm(0,1.E-4)
    ag[i] ~ dnorm(0,1.E-4)
    bg[i] ~ dnorm(0,1.0E-4)
```

```

    tau_p4[i] ~ dgamma(.001,.001) }
    ap4 ~ dnorm(0,1.0E-4)
    bp4 ~ dnorm(0,1.E-4)
# Dumouchal priors
for (i in 1 : 3) {
  U_1[i] ~ dunif(0, 1)
  sqrvarbp[i] <- s_slope_p[i] * (1 - U_1[i]) / U_1[i]
  varbp[i] <- sqrvarbp[i] * sqrvarbp[i]
  taubp[i] <- 1/varbp[i]
  U_2[i] ~ dunif(0, 1)
  sqrvarbg[i] <- s_slope_g[i] * (1 - U_2[i]) / U_2[i]
  varbg[i] <- sqrvarbg[i] * sqrvarbg[i]
  taubg[i] <- 1/varbg[i]
  U_3[i] ~ dunif(0, 1)
  sqrvarap[i] <- s_int_p[i] * (1 - U_3[i]) / U_3[i]
  varap[i] <- sqrvarap[i] * sqrvarap[i]
  tauap[i] <- 1/varap[i]
  U_4[i] ~ dunif(0, 1)
  sqrvarag[i] <- s_int_g[i] * (1 - U_4[i]) / U_4[i]
  varag[i] <- sqrvarag[i] * sqrvarag[i]
  tauag[i] <- 1/varag[i]      }
  U1 ~ dunif(0, 1)
  sqrvarbp4 <- s_slope_p4 * (1 - U1) / U1
  varbp4 <- sqrvarbp4 * sqrvarbp4
  taubp4 <- 1/varbp4
  U2 ~ dunif(0, 1)
  sqrvarap4 <- s_int_p4 * (1 - U2) / U2
  varap4 <- sqrvarap4 * sqrvarap4
  tauap4 <- 1/varap4
# estimating the difference in slope and intercept for Btheta, Entero1 and Entero2
for (i in 1 : 3) {
  diff_slope[i] <- bg[i] - bp[i]
  diff_int[i] <- ag[i] - ap[i] }
# estimating the mean difference in slope and intercept (to be used in HF183)
d_slope <- mean(diff_slope[])
d_int <- mean(diff_int[])
# estimating the genome intercept and slope for HF183
genome4_int <- ap4 + d_int
genome4_slope <- bp4 + d_slope
# estimatinf the log10 copy number for HF183
for (i in 1:np4) {
  lcopy4[i] <- (ct4[i] - genome4_int)/genome4_slope }
}

```

#### Data

```

list( n=239, m=23, n4=40,np4=4, s_slope_p=c( 0.075104,0.095792,0.107489),
s_slope_g=c( 0.085519 , 0.066039 , 0.098919),

```

```

s_int_p=c(0.238018,0.303586,0.346371), s_int_g=c( 0.271027,0.210087, 0.315319),
s_slope_p4=0.123962, s_int_p4=0.415432)
run[] Copy[] CT_genome[] CT_plasmid[]
1 100 32.10291 31.25919
1 100 32.221012 31.16806
1 200 30.735775 30.46597
1 200 31.085876 30.20037
.
.
23 100 32.513058 31.132364
23 100 32.539833 31.328972
END;
run4[] Copy4[] CT_plasmid4[]
1 40000 27.261871
1 40000 25.704222.
.
.
5 100 35.2057
5 100 35.28721
END;
# Unknown samples
ct4[]
33.49
32.11
32.05
39.46
END;

```

## Output

| Assay                  | Type                      | Parameter                  | node          | Mean  | St. dev | 95% LCB | 95% UCB |
|------------------------|---------------------------|----------------------------|---------------|-------|---------|---------|---------|
| <b>Btheta</b>          | Plasmid                   | intercept                  | alpha_p[1]    | 38.83 | 0.36    | 38.12   | 39.55   |
|                        |                           | slope                      | beta_p[1]     | -3.45 | 0.03    | -3.51   | -3.38   |
|                        | Genome                    | intercept                  | alpha_g[1]    | 39.37 | 0.27    | 38.84   | 39.90   |
|                        |                           | slope                      | beta_g[1]     | -3.60 | 0.04    | -3.67   | -3.53   |
|                        |                           | intercept diff.            | diff_int[1]   | 0.54  | 0.45    | -0.36   | 1.44    |
|                        | slope diff.               | diff_slope[1]              | -0.15         | 0.05  | -0.26   | -0.05   |         |
| <b>Enterol1</b>        | Plasmid                   | intercept                  | alpha_p[2]    | 38.36 | 0.14    | 38.08   | 38.64   |
|                        |                           | slope                      | beta_p[2]     | -3.45 | 0.04    | -3.53   | -3.36   |
|                        | Genome                    | intercept                  | alpha_g[2]    | 38.42 | 0.08    | 38.26   | 38.58   |
|                        |                           | slope                      | beta_g[2]     | -3.47 | 0.03    | -3.52   | -3.42   |
|                        |                           | intercept diff.            | diff_int[2]   | 0.06  | 0.17    | -0.27   | 0.39    |
|                        | slope diff.               | diff_slope[2]              | -0.03         | 0.05  | -0.13   | 0.07    |         |
| <b>Enterol2</b>        | Plasmid                   | intercept                  | alpha_p[3]    | 38.81 | 0.46    | 37.90   | 39.71   |
|                        |                           | slope                      | beta_p[3]     | -3.46 | 0.05    | -3.56   | -3.36   |
|                        | Genome                    | intercept                  | alpha_g[3]    | 39.75 | 0.41    | 38.93   | 40.58   |
|                        |                           | slope                      | beta_g[3]     | -3.61 | 0.05    | -3.71   | -3.53   |
|                        |                           | intercept diff.            | diff_int[3]   | 0.94  | 0.61    | -0.28   | 2.15    |
|                        | slope diff.               | diff_slope[3]              | -0.16         | 0.07  | -0.29   | -0.01   |         |
| <b>All 3 assays</b>    |                           | mean int. diff.            | d_int         | 0.52  | 0.26    | -0.09   | 1.03    |
|                        |                           | mean slope diff.           | d_slope       | -0.11 | 0.03    | -0.18   | -0.04   |
| <b>HF183</b>           | Plasmid                   | intercept                  | alpha_p4      | 42.17 | 0.23    | 41.70   | 42.62   |
|                        |                           | slope                      | beta_p4       | -3.52 | 0.07    | -3.66   | -3.37   |
|                        | <b>Genome (simulated)</b> | intercept                  | genome4_int   | 42.69 | 0.35    | 41.99   | 43.37   |
|                        |                           | slope                      | genome4_slope | -3.63 | 0.08    | -3.79   | -3.46   |
|                        | <b>River (unknown)</b>    | Log <sub>10</sub> (copy #) | lcopy4[1]     | 2.54  | 0.08    | 2.38    | 2.69    |
|                        |                           |                            | lcopy4[2]     | 2.92  | 0.08    | 2.76    | 3.08    |
|                        |                           |                            | lcopy4[3]     | 2.93  | 0.08    | 2.78    | 3.09    |
| lcopy4[4]              | 0.89                      |                            | 0.09          | 0.72  | 1.06    |         |         |
| <b>Marine(unknown)</b> |                           |                            |               |       |         |         |         |
